# Supplementary material for: Reagentless and sensitive determination of carcinoembryonic antigen based on a stable Prussian blue modified electrode
Source: Royal Society of Chemistry journal article supplement (doi:10.1039/d0ra06751b), 2020-01-01
Supplement: d0ra06751b1.pdf [file d0ra06751b1.pdf]

## Supplementary materials

### Figures

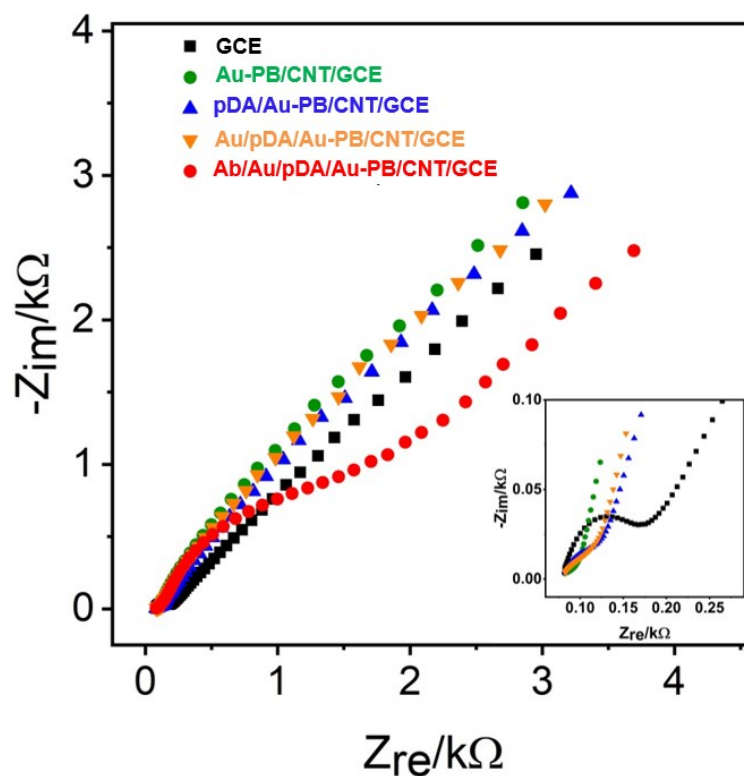

**Fig. S1** EIS of different electrodes measured in  $\text{Fe}(\text{CN})_6^{3-/4-}$  (2.0 mM) containing 0.1 M KCl. The inset shows the enlarged view of the EIS curves obtained on different electrodes (except for Ab/Au/pDA/Au-PB/CNT/GCE) in the low-frequency region.

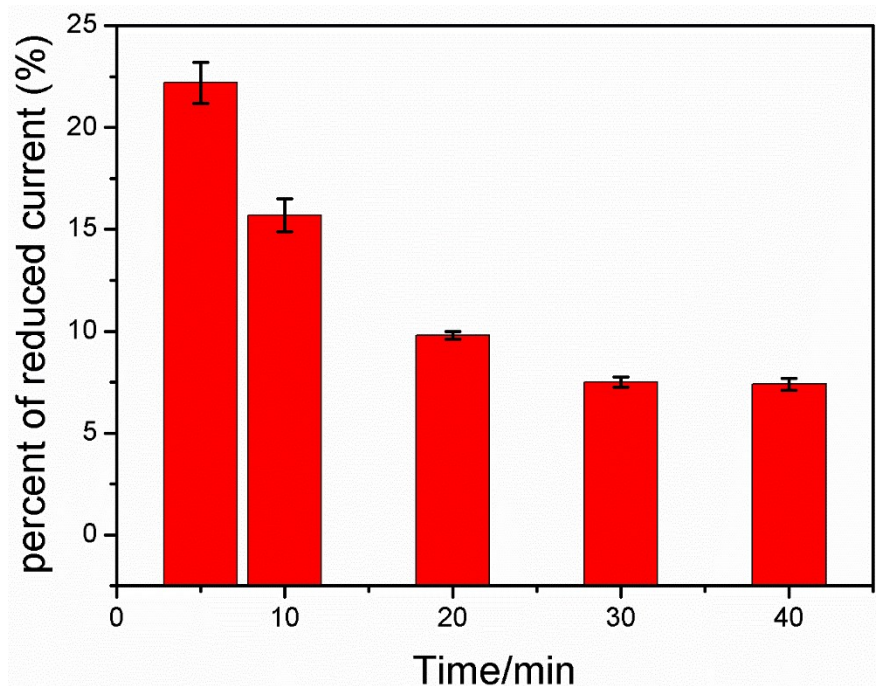

**Fig. S2** The percent of reduced current (%) obtained by 20 continuous scans on pDA/Au-PB/CNT/GCE prepared using different polymerization time of dopamine.

## Tables

**Table S1.** Comparison of different sensors for CEA detection

| <b>Sensing element</b>                                                             | <b>Method</b>    | <b>Linear range (ng/mL)</b> | <b>LOD (pg/mL)</b> | <b>Ref.</b> |
|------------------------------------------------------------------------------------|------------------|-----------------------------|--------------------|-------------|
| Ab/Ag <sub>2</sub> S@ZnO/AuNPs                                                     | colorimetry      | 0.1-20                      | 50                 | 26          |
| Ab/chitosan-AuNPs/GCE                                                              | electrochemistry | 0.5-60                      | 100                | 27          |
| Ab/chitosan glutaraldehyde                                                         | colorimetry      | 0.1-20                      | 30                 | 28          |
| Ab/Ag-Co <sub>3</sub> O <sub>4</sub> @N-doped graphene oxide/GCE                   | electrochemistry | 0.001-200                   | 0.18               | 31          |
| TiO <sub>2</sub> -AuNPs-carbon paste electrode                                     | electrochemistry | 0.01-20                     | 10                 | 29          |
| Ab/polyethyleneimine/AuNPs@nafion/K <sub>3</sub> Fe(CN) <sub>6</sub> @chitosan/GCE | electrochemistry | 0.01-150                    | 3                  | 32          |
| Ab/AuNPs/Au electrode                                                              | electrochemistry | 0.5-20                      | 100                | 30          |
| Ab/Au/pDA/Au-PB/CNT/GCE                                                            | electrochemistry | 0.005-50                    | 3.3                | this work   |
